# Supplementary material for: Evaluation of Physicians’ Knowledge and Attitudes Towards Biosimilars in Russia and Issues Associated with Their Prescribing
Source: MDPI journal article supplement (doi:10.3390/biom9020057), 2019-02-11
Supplement: s1 [file s1]

**Figure S1. Prescribing of biological medicines and familiarity with biosimilars (N=210)**

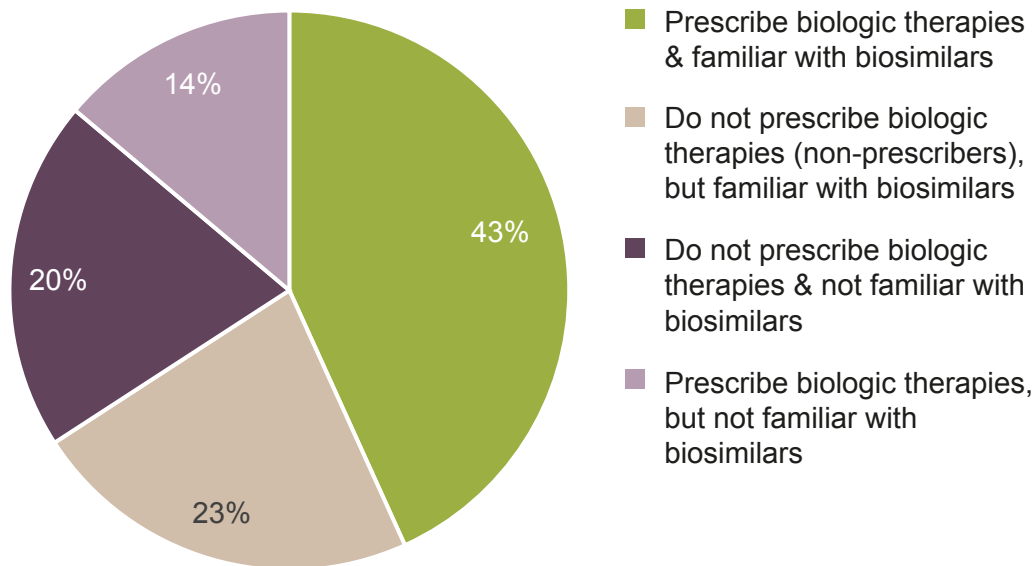

Data were extracted from questions S2 and S3 of the questionnaire (see Supplementary File 2: Survey Questionnaire 1).
