# Supplementary material for: Evaluation of Physicians’ Knowledge and Attitudes Towards Biosimilars in Russia and Issues Associated with Their Prescribing
Source: Biomolecules. 2019 Feb 11;9(2):57. doi: 10.3390/biom9020057 (PMC6406747; doi:10.3390/biom9020057)
Supplement: Supplementary file 1 [file biomolecules-09-00057-s001.zip]

Archive with 7 entries (7 files):
- Russian Phys manuscript_Biomolecules_Supp File 1_Table S1_21dec18_1.0.docx
- Russian Phys manuscript_Biomolecules_Supp File 2_Survey Q1_15jan19_2.0.docx
- Russian Phys manuscript_Biomolecules_Supp File 3_Survey Q2_21dec18_1.0.docx
- Russian Phys manuscript_Biomolecules_Supp File 4_Figure S1_15jan19_1.0.pdf
- Russian Phys manuscript_Biomolecules_Supp File 5_Figure S2_15jan19_2.0.pdf
- Russian Phys manuscript_Biomolecules_Supp File 6_Table S2_15jan19_2.0.docx
- Russian Phys manuscript_Biomolecules_Supp File 7_Figure S3_15jan19_1.0.pdf
