# Supplementary figures and images for: Evaluation of Physicians’ Knowledge and Attitudes Towards Biosimilars in Russia and Issues Associated with Their Prescribing
Source: MDPI journal article supplement (doi:10.3390/biom9020057), 2019-02-11

**Figure S2. Russian physicians included in the analysis**

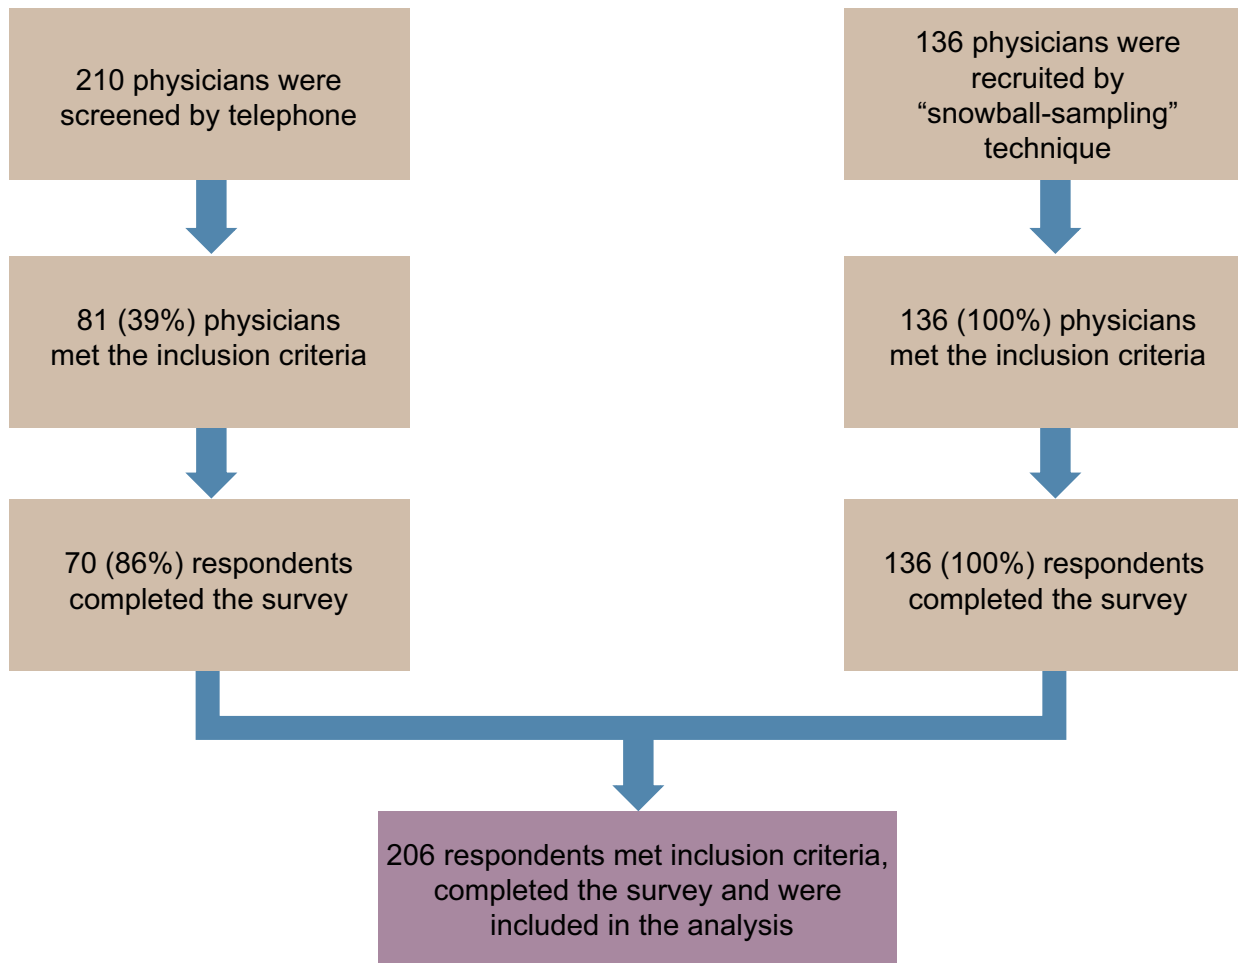

Supplement: s1 [file s1]
